# Supplementary material for: Phosphorylation of the transcriptional repressor MYB15 by mitogen-activated protein kinase 6 is required for freezing tolerance in Arabidopsis
Source: PubMed Central journal article supplement — Nucleic Acids Res. 2017 May 16;45(11):6613–27. doi: 10.1093/nar/gkx417 (PMC5499865; doi:10.1093/nar/gkx417), 2017-05-16
Supplement: gkx417_Supp.pdf [file gkx417_Supp.pdf]

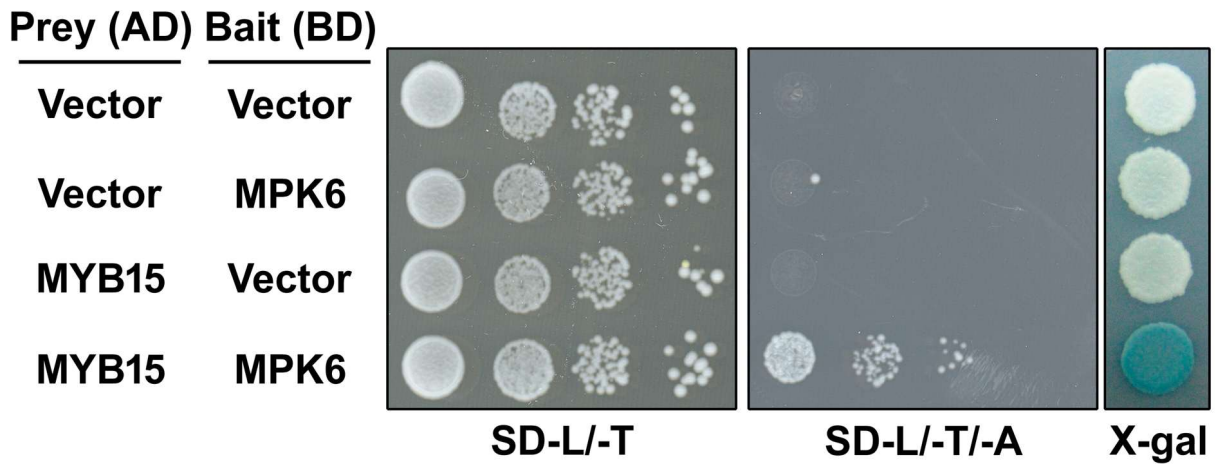

1  
2  
3  
4  
5  
6  
7  
8  
9  
10

**Figure S1.** Yeast two-hybrid analysis showing the interaction of MYB15 with MPK6. The indicated prey and bait plasmids were co-transformed into yeast strain pJ69-4A. Shown are serial dilution growth tests of the transformants on selective SD medium lacking Leu and Trp (SD-L/-T) (control) and on SD medium lacking Leu, Trp, and Ade (SM-L/-T/-A) to demonstrate activation of the *ADE2* reporter gene. A filter lift assay for  $\beta$ -galactosidase activity (X-gal) is also shown. Blue color indicates high  $\beta$ -galactosidase activity caused by the activation of the *LacZ* reporter. BD indicates fusion to a plasmid containing the GAL4 DNA-binding domain, and AD indicates fusion to a GAL4 transcriptional activation domain.

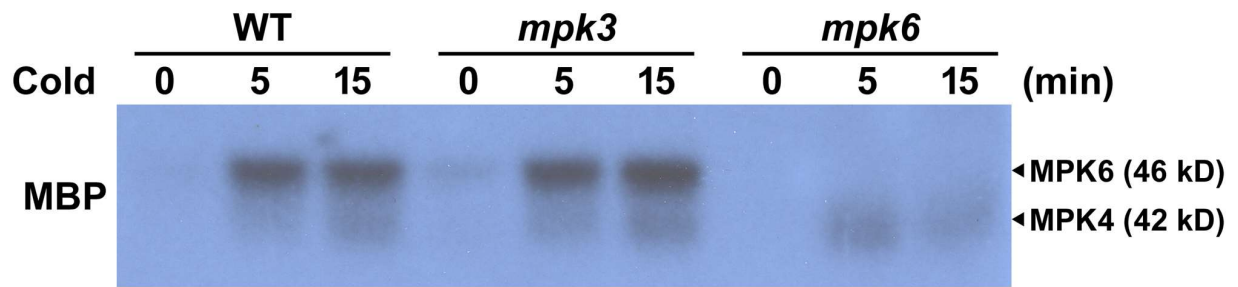

1

2

3 **Figure S2.** Cold-triggered activation of MPK4 and MPK6 *in planta*. Leaves of 3-week-old WT,  
 4 *mpk3*, and *mpk6* plants were subjected to cold (4°C) treatment for the indicated times to induce  
 5 MPK activity. Shown are autoradiographs of SDS-polyacrylamide gels containing embedded MBP  
 6 depicting signals from an in-gel kinase assay on resolved proteins from extracts of treated leaves.  
 7 The expected positions of MPK4 and MPK6 are indicated on the gels.

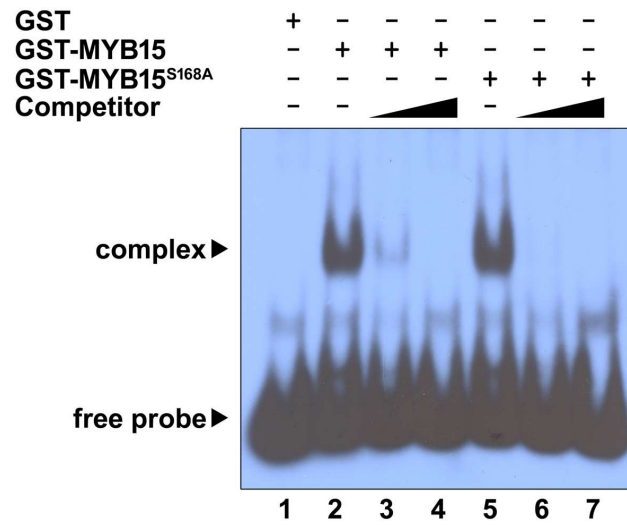

1

2

3 **Figure S3.** Analysis of the binding specificity of MYB15 or MYB15<sup>S168A</sup> to *CBF3* promoter  
 4 fragments. Shown are the results of an EMSA performed using a <sup>32</sup>P-labelled *CBF3* promoter  
 5 fragment (-984 to -785 bp region) as a probe, except that GST-MYB15 and GST-MYB15<sup>S168A</sup>  
 6 proteins were incubated with a 100-fold (lanes 3 and 6) or 200-fold (lanes 4 and 7) molar excess  
 7 of unlabeled probes (competitor) before adding labeled probes.

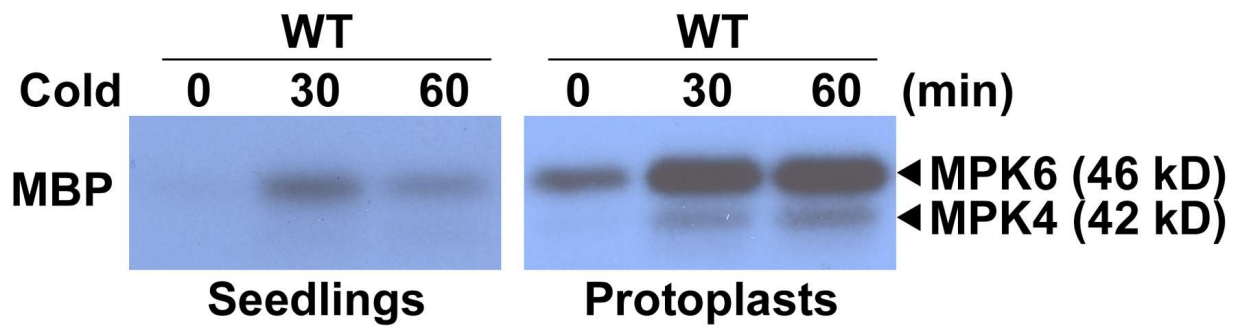

1  
2  
3  
4  
5  
6  
7  
8

**Figure S4.** Comparison of the activities of cold-activated MPKs in wild-type (WT) seedlings and protoplasts. WT seedlings and protoplasts were subjected to cold (4°C) treatment for the indicated times to induce MPK activity. Shown are autoradiographs of SDS-polyacrylamide gels containing embedded myelin basic protein (MBP), depicting signals from an in-gel kinase assay on resolved proteins from extracted proteins. The expected positions of MPK4 and MPK6 are indicated on the gels.

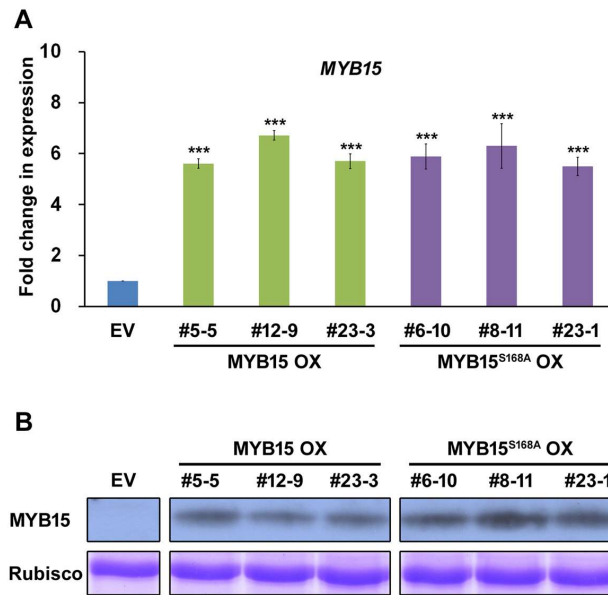

1  
2  
3  
4  
5  
6  
7  
8  
9  
10  
11  
12  
13

**Figure S5.** Characterization of MYB15 OX and MYB15<sup>S168A</sup> OX transgenic plants. (A) Shown is an analysis of transcript levels of *MYB15* and *Tubulin* (loading control) by quantitative RT-PCR using total RNA prepared from 3-week-old Petri dish-grown seedlings harboring empty vector (EV) and T<sub>3</sub> homozygous progeny of three independent lines of *CaMV35S:3XFlag-MYB15* (MYB15 OX) and *CaMV35S:3XFlag-MYB15<sup>S168A</sup>* (MYB15<sup>S168A</sup> OX) transformants. Data are presented as the mean ± SD of three independent experiments. P < 0.001 (\*\*\*) indicate statistically significant changes. (B) Shown is an immunoblot and Coomassie Brilliant Blue (CBB) staining of a polyacrylamide gel containing resolved total proteins isolated from the above seedlings. The gel blot was probed with anti-Flag antibody (anti-Flag antibody). The ribulose-1,5-bisphosphate carboxylase/oxygenase (Rubisco) band detected by CBB staining shows the amount of proteins loaded in each well.

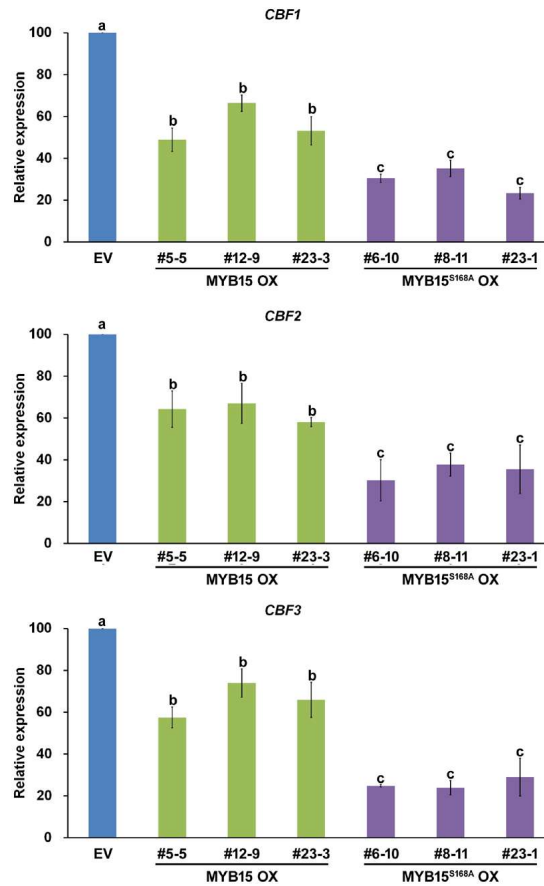

1  
2

3 **Figure S6.** Comparison of transcripts of *CBF* genes from three, independent, cold-stressed  
 4 MYB15 and MYB15<sup>S168A</sup> lines. Quantitative reverse transcription polymerase chain reaction (RT-  
 5 qPCR) analysis of *CBF* was performed using total RNA isolated from seedlings of the indicated  
 6 lines subjected to cold (4°C) treatment for 3 h. cDNA was synthesized from 5 µg of total RNA and  
 7 used as a template for RT-qPCR. Data are presented as the mean ± SD of three independent  
 8 experiments. Different letters represent statistically significant differences between genotypes (*P*  
 9 < 0.001).

1 **Table S1.** Primers used for construction and site-directed mutagenesis of *MYB15* plasmids.

| <b>Construct</b>                     | <b>Position</b> | <b>Sequence</b>                                     |
|--------------------------------------|-----------------|-----------------------------------------------------|
| GST-MYB15                            | F               | 5'- <i>ggatcc</i> ATGGGAAGAGCTCCATGCTG-3'           |
|                                      | R               | 5'- <i>gaattccccggg</i> CTAGAGCCCGGCTAAGAGATCTTG-3' |
| GST-MYB15 N<br>(amino acids 1-172)   | F               | 5'- <i>ggatcc</i> ATGGGAAGAGCTCCATGCTG-3'           |
|                                      | R               | 5'- <i>ctcgag</i> CTAACTTGTCGAAGGCGATGTCG-3'        |
| GST-MYB15 C<br>(amino acids 173-285) | F               | 5'- <i>ggatcc</i> GAGGTTTCTTCGATGACACT-3'           |
|                                      | R               | 5'- <i>gaattccccggg</i> CTAGAGCCCGGCTAAGAGATCTTG-3' |
| MYB15<br>(yeast two-hybrid)          | F               | 5'- <i>ggatcc</i> GAGGTTTCTTCGATGACACT-3'           |
|                                      | R               | 5'- <i>gaattccccggg</i> CTAGAGCCCGGCTAAGAGATCTTG-3' |
| MYB15 <sup>T18A</sup>                | F               | 5'-GGACCATGGGCACCTGAAGAAGATCAAATC-3'                |
|                                      | R               | 5'-TTCTTCAGGTGCCCATGGTCCTCTCTTCAA-3'                |
| MYB15 <sup>S168A</sup>               | F               | 5'-TTTTCGACAGCGCCTTCGACAAGTGAGTT-3'                 |
|                                      | R               | 5'-TGTCGAAGGCGCTGTCGAAAATAAGCTTTC-3'                |

2

1 **Table S2.** Primers used to construct *MPK3*, *MPK4*, and *MPK6* plasmids.

| Construct                  | Position | Sequence                                  |
|----------------------------|----------|-------------------------------------------|
| His-MPK3                   | F        | 5'- <i>ggatcc</i> ATGAACACCGGCGGTGGCCA-3' |
|                            | R        | 5'- <i>gtcgac</i> CTAACCGTATGTTGGATTGA-3' |
| His-MPK4                   | F        | 5'- <i>ggatcc</i> ATGTCGGCGGAGAGTTGTTT-3' |
|                            | R        | 5'- <i>gtcgac</i> CTACACTGAGTCTTGAGGAT-3' |
| His-MPK6                   | F        | 5'- <i>ggatcc</i> ATGGACGGTGGTTCAGGTCA-3' |
|                            | R        | 5'- <i>gtcgac</i> CTATTGCTGATATTCTGGAT-3' |
| MPK3<br>(yeast two-hybrid) | F        | 5'- <i>ggatcc</i> ATGAACACCGGCGGTGGCCA-3' |
|                            | R        | 5'- <i>ctgcag</i> CTAACCGTATGTTGGATTGA-3' |
| MPK4<br>(yeast two-hybrid) | F        | 5'- <i>ggatcc</i> ATGTCGGCGGAGAGTTGTTT-3' |
|                            | R        | 5'- <i>ctgcag</i> CTACACTGAGTCTTGAGGAT-3' |
| MPK6<br>(yeast two-hybrid) | F        | 5'- <i>ggatcc</i> ATGGACGGTGGTTCAGGTCA-3' |
|                            | R        | 5'- <i>ctgcag</i> CTATTGCTGATATTCTGGAT-3' |

2



1 **Table S3.** Primers used for quantitative RT-PCR.

| <b>Gene</b>    | <b>Position</b> | <b>Sequence</b>                             |
|----------------|-----------------|---------------------------------------------|
| <i>MYB15</i>   | F               | 5'-GGATTTCGAGGTTTCTTCGATGACACT-3'           |
|                | R               | 5'-GGATTCCCCGGGCTAGAGCCCCGGCTAAGAGATCTTG-3' |
| <i>CBF1</i>    | F               | 5'-TGATACGACGACCACGAATC-3'                  |
|                | R               | 5'-AGTAACTCCAAAGCGACACG-3'                  |
| <i>CBF2</i>    | F               | 5'-TATGACGACGGATGCTCATG-3'                  |
|                | R               | 5'-CTCCATAAGGACACGTCATC-3'                  |
| <i>CBF3</i>    | F               | 5'-GATGACGACGTATCGTTATGG-3'                 |
|                | R               | 5'-TACACTCGTTTCTCAGTTTTACAAAC-3'            |
| <i>Tubulin</i> | F               | 5'-CCAACAACGTGAAATCGACAG-3'                 |
|                | R               | 5'-TCTTGGTATTGCTGGTACTCT-3'                 |

2

1 **Table S4.** Mass spectrometry analysis of tryptic digests of unphosphorylated MYB15 and MPK6-  
 2 phosphorylated MYB15.

| Peptide sequence          | Position of MYB15 | No. of phosphate groups | (M+H)    |          | Putative phosphorylation site |
|---------------------------|-------------------|-------------------------|----------|----------|-------------------------------|
|                           |                   |                         | Expected | Measured |                               |
| SESELADSSNPSGESLFSTS*PSTS | 149-172           | 1 phospho               | 2482.9   | 2483.0   | S168                          |

3 \*Amino acid residue that could potentially be phosphorylated by MPK6.
